# Supplementary material
Source: MDPI journal article supplement (https://www.mdpi.com/2673-4079/4/1/8)
Supplement: s1 [file s1]

Archive with 1 entries (1 files):
- suschem-2148747-supplementary.pdf
